# Supplementary material for: Substituted diphenyl butadiynes: a computational study of geometries and electronic transitions using DFT/TD-DFT
Source: Royal Society of Chemistry journal article supplement (doi:10.1039/c4cp00580e), 2014-01-01
Supplement: c4cp00580e1.pdf [file c4cp00580e1.pdf]

## Supplementary Information

Substituted diphenyl butadiynes: a computational study of geometries and electronic transitions using DFT/TD-DFT

Avik Kumar Pati,<sup>†</sup> Santosh J. Gharpure<sup>\*†,‡</sup> and Ashok K. Mishra<sup>\*†</sup>

<sup>†</sup>*Department of Chemistry, Indian Institute of Technology Madras, Chennai 600036,*

*Tamil Nadu, India, <sup>‡</sup>Department of Chemistry, Indian Institute of Technology Bombay, Powai, Mumbai 400076, India.*

**Table of Contents:** 1. Optimized ground state geometry of the fluorophores (Fig. S1), 2. Mulliken charge analysis of **Me<sub>2</sub>NMe<sub>2</sub>N** (Fig. S2), **PhMe<sub>2</sub>N** (Fig. S3), **Me<sub>2</sub>NOMe** (Fig. S4), and **Me<sub>2</sub>NCN** (Fig. S5), 3. Combined plot of Mulliken charge analysis of **PhMe<sub>2</sub>N** and **Me<sub>2</sub>NCN** (Fig. S6), 4. Correlation of C(Ph)–O(OMe) bond length with dielectric constant (Fig. S7), 5. UV-vis experimental absorption spectra of the fluorophores in cyclohexane (Fig. S8 and S9), 6. Variation of absorption wavelength with dielectric constant (Fig. S10 and S11), 7. Variation of HOMO and LUMO energy for different fluorophores (Fig. S12), 8. Orbital contributions ( $S_0 \rightarrow S_1$ ) for the fluorophores (Table S1 and S2), 9. TDDFT potential energy curves (Fig. S13 and S14), 10. Correlation between experimental and TD-DFT absorption wavelength in DCM (Fig. S15), MeOH (Fig. S16), and CH<sub>3</sub>CN (Fig. S17), 11. Correlation of vertical excitation energy with (a) twist angle, (b) pyramidalization, and (c) C(Ph)–N(NMe<sub>2</sub>) bond length in **Me<sub>2</sub>NOMe** (Fig. S18) and **Me<sub>2</sub>NCN** (Fig. S19), 12. Optimized LE state geometry of the fluorophores (Fig. S20), 13. Geometrical parameters of ICT state of **PhMe<sub>2</sub>N** (Fig. S21), 14. ICT emission energy of **PhCN** and **Me<sub>2</sub>NCN** (Table S3), 15. HOMO and LUMO in ICT emissive state in CH<sub>3</sub>CN (Fig. S22), 16. Magnitude of absorption and LE TDM (Table S4), 17. Cartesian co-ordinates of the optimized geometries.

| Molecules            | Cyclohexane                                                                         | CH <sub>3</sub> CN                                                                   |
|----------------------|-------------------------------------------------------------------------------------|--------------------------------------------------------------------------------------|
| PhPh                 | 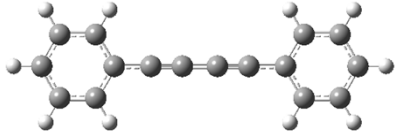   |    |
| OMeOMe               |    |    |
| PhCN                 |    |    |
| PhOMe                |   |   |
| PhMe <sub>2</sub> N  |  |  |
| Me <sub>2</sub> NOMe |  |  |
| Me <sub>2</sub> NCN  |  |  |

**Fig. S1** Optimized ground state geometry of the fluorophores using B3LYP/6-311G(d,p)

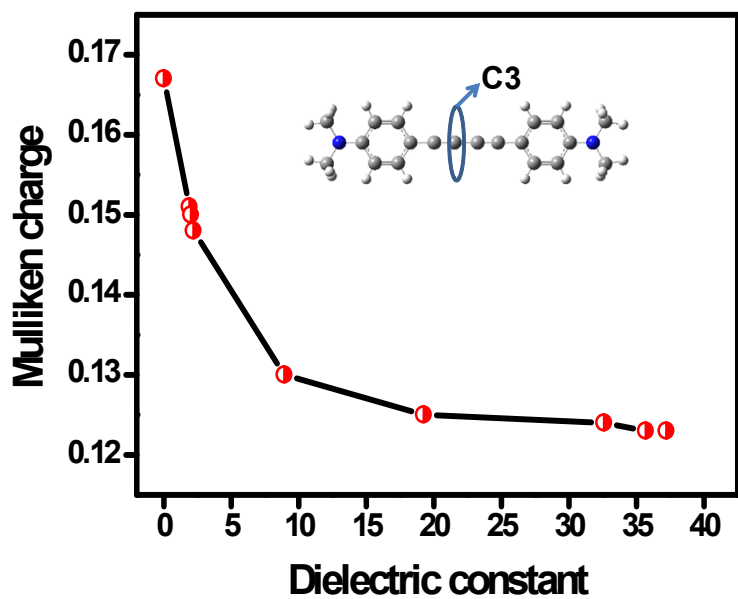

Fig. S2 Mulliken charge analysis of C3 of the derivative **Me<sub>2</sub>NMe<sub>2</sub>N** using B3LYP/6-311G(d,p)

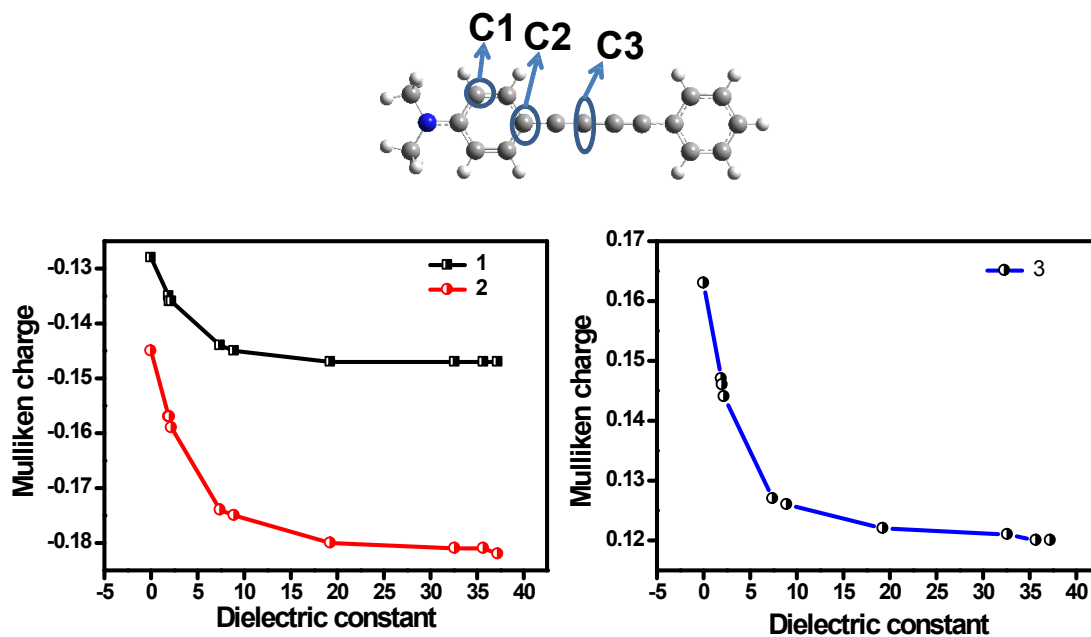

Fig. S3 Mulliken charge analysis of C1, C2, and C3 of the derivative **PhMe<sub>2</sub>N** using B3LYP/6-311G(d,p)

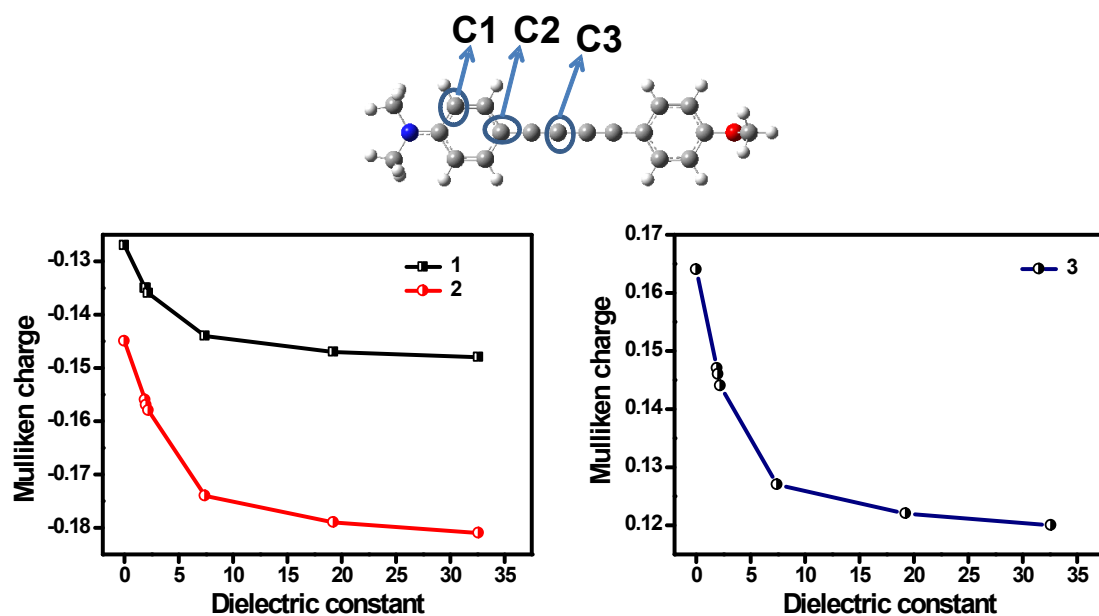

Fig. S4 Mulliken charge analysis of C1, C2, and C3 of the derivative  $\text{Me}_2\text{NOMe}$  using B3LYP/6-311G(d,p)

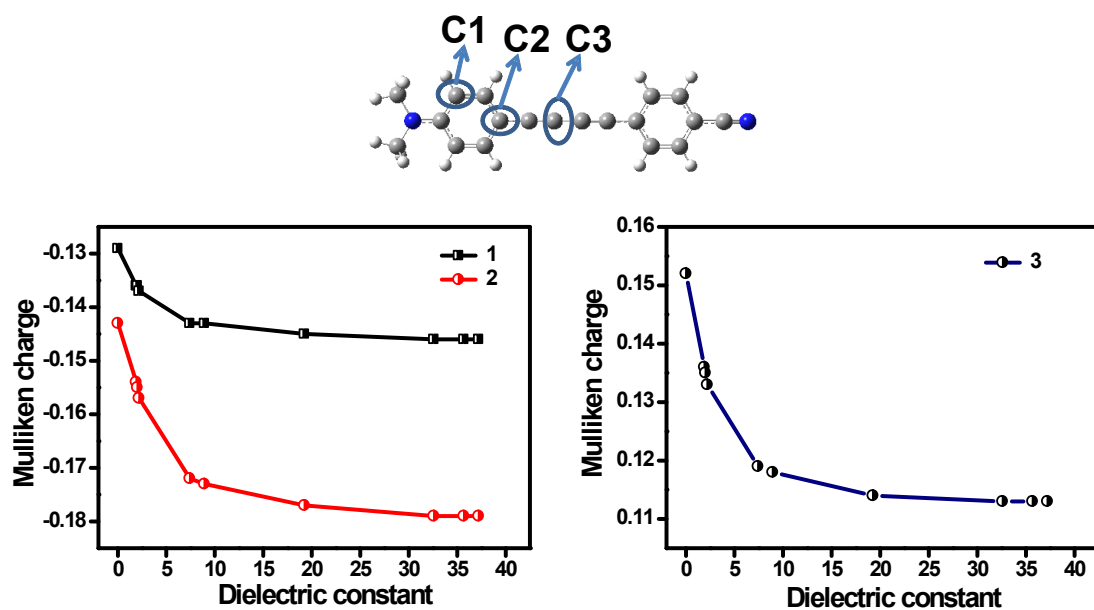

Fig. S5 Mulliken charge analysis of C1, C2, and C3 of the derivative  $\text{Me}_2\text{NCN}$  using B3LYP/6-311G(d,p)

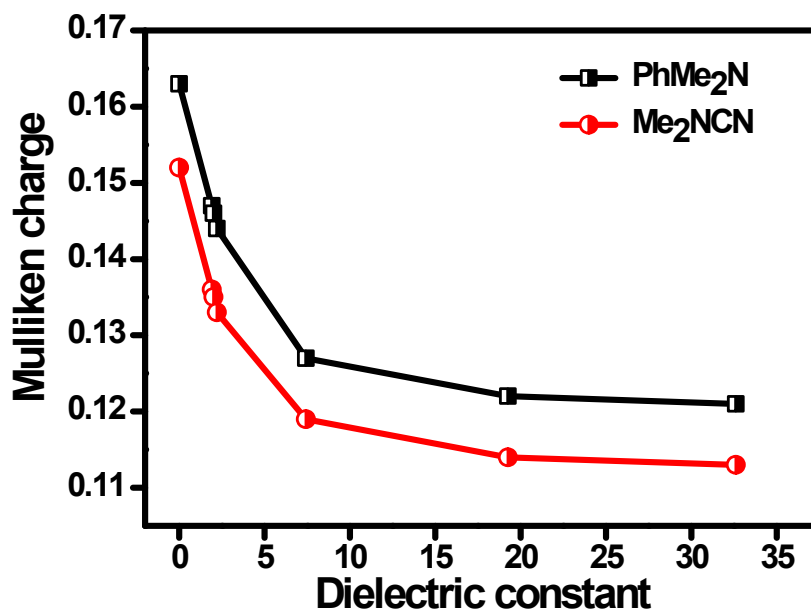

Fig. S6 Mulliken charge analysis of C3 of the derivative **PhMe<sub>2</sub>N** and **Me<sub>2</sub>NCN** using B3LYP/6-311G(d,p)

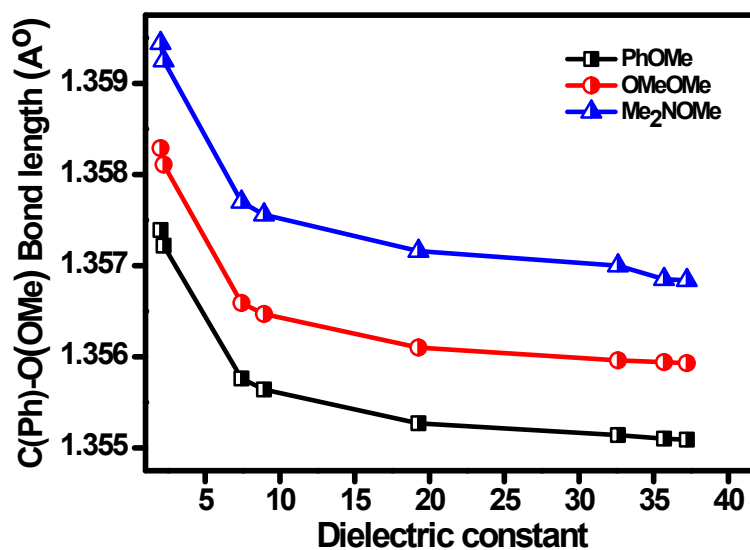

Fig. S7 Correlation of C(Ph)–O(OMe) bond length with dielectric constant at ground state B3LYP/6-311G(d,p) optimized geometry

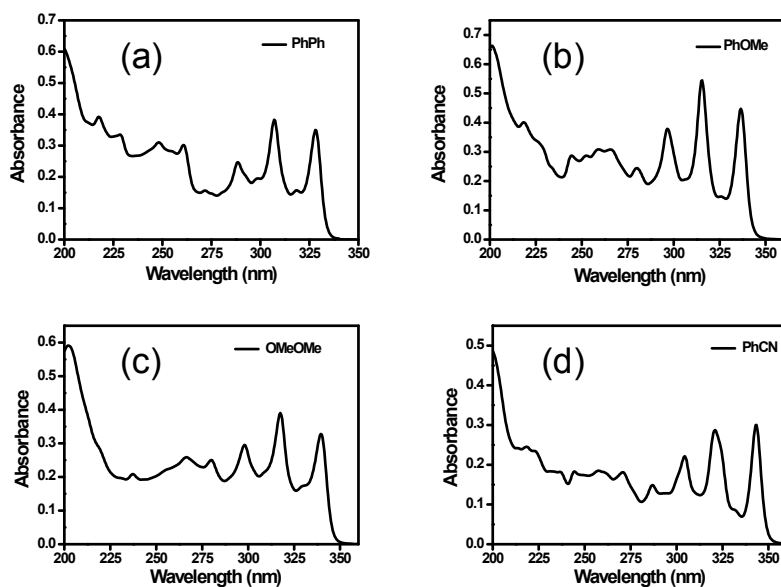

**Fig. S8** UV-vis experimental absorption spectra of (a) **PhPh**, (b) **PhOMe**, (c) **OMeOMe**, and (d) **PhCN** in cyclohexane (concentration =  $1 \times 10^{-5}$  M) with high resolution (JASCO V-650, bandwidth = 0.5 nm)

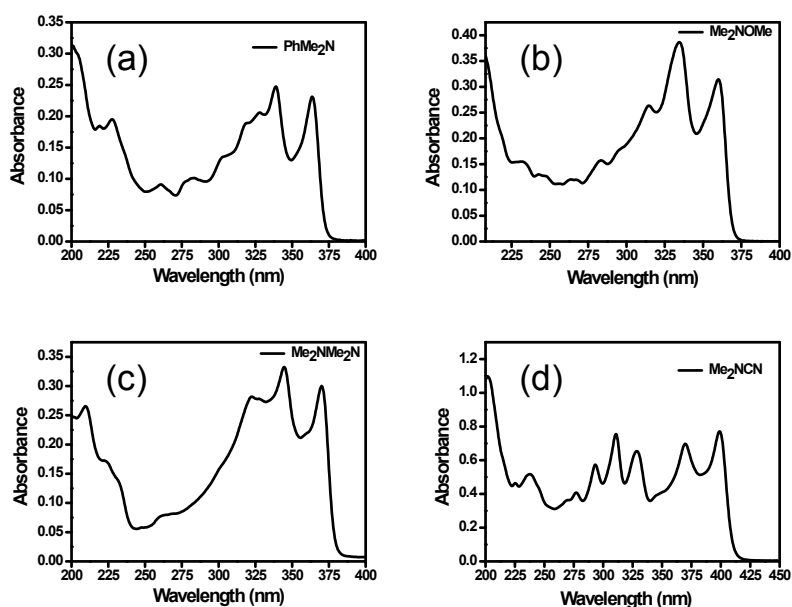

**Fig. S9** UV-vis experimental absorption spectra of (a) **PhMe<sub>2</sub>N**, (b) **Me<sub>2</sub>NOMe**, (c) **Me<sub>2</sub>NMe<sub>2</sub>N**, and (d) **Me<sub>2</sub>NCN** in cyclohexane (concentration =  $1 \times 10^{-5}$  M for a, b, c and concentration =  $1.9 \times 10^{-5}$  M for d) with high resolution (JASCO V-650, bandwidth = 0.5 nm)

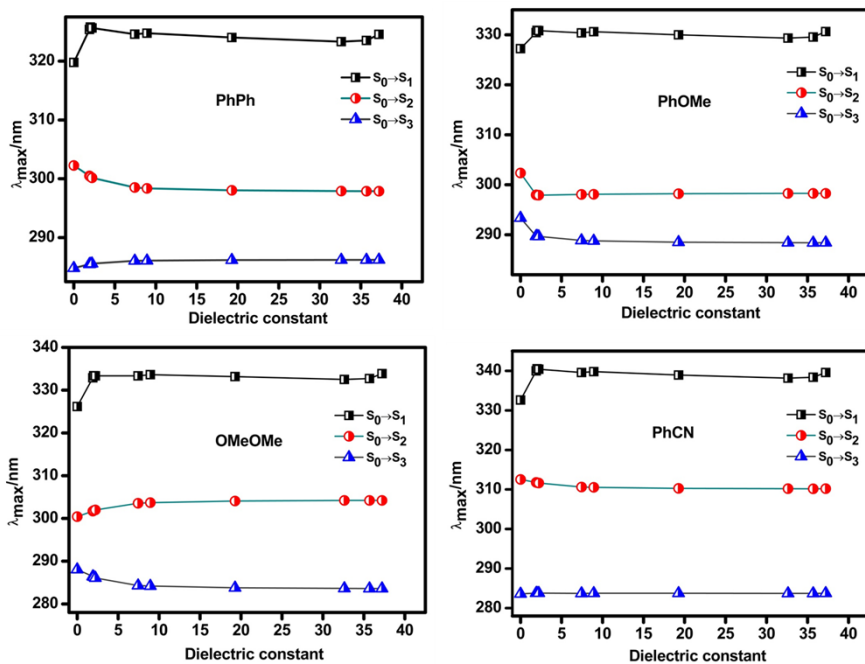

**Fig. S10** Variation of absorption wavelength with dielectric constant for (a) **PhPh**, (b) **PhOMe**, (c) **OMeOMe**, and (d) **PhCN** using CAM-B3LYP/6-311+G(d,p)

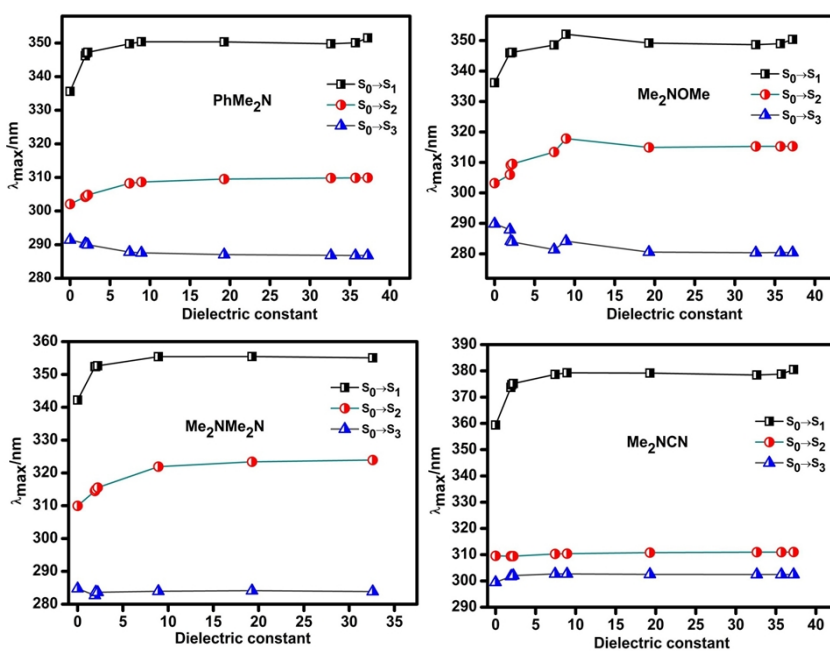

**Fig. S11** Variation of absorption wavelength with dielectric constant for (a) **PhMe<sub>2</sub>N**, (b) **Me<sub>2</sub>NOMe**, (c) **Me<sub>2</sub>NMe<sub>2</sub>N**, and (d) **Me<sub>2</sub>NCN** using CAM-B3LYP/6-311+G(d,p)

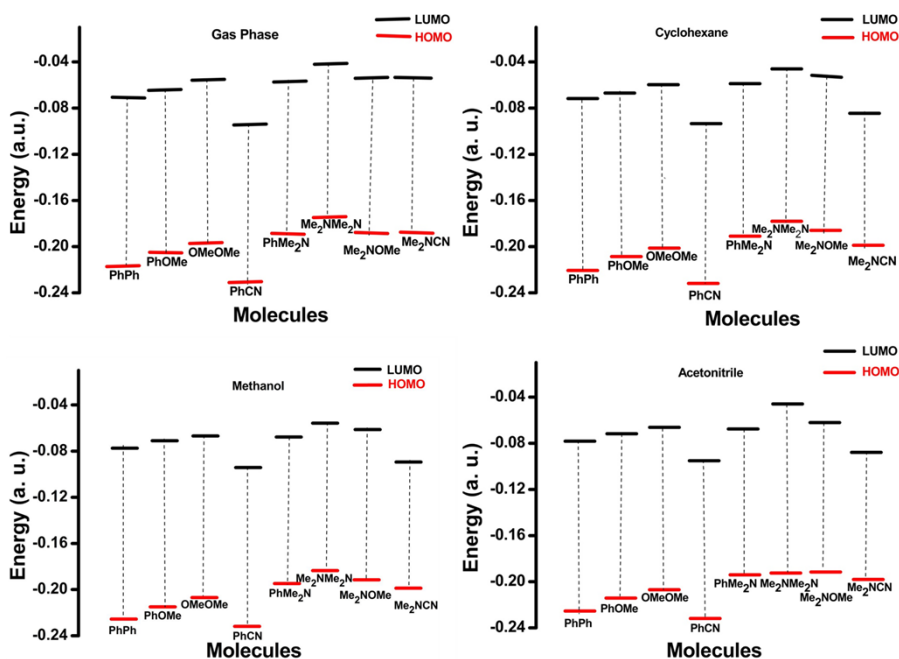

**Fig. S12** Variation of HOMO and LUMO energy of different butadiynyl fluorophores in (a) gas phase, (b) cyclohexane, (c) methanol, and (d)  $\text{CH}_3\text{CN}$  using B3LYP/6-311G(d,p)

**Table S1** % of orbital contributions ( $S_0 \rightarrow S_1$ ) for the fluorophores in cyclohexane

| Molecule                              | % of orbital contributions |                           |                           |                           |                           |
|---------------------------------------|----------------------------|---------------------------|---------------------------|---------------------------|---------------------------|
|                                       | BLYP/<br>6-311G(d,p)       | PBE/<br>6-311G(d,p)       | B3LYP/<br>6-311G(d,p)     | B98/<br>6-311G(d,p)       | PBE0/<br>6-311G(d,p)      |
| <b>PhPh</b>                           | H→L (95%)<br>H-1→L+1 (5%)  | H→L (95%)<br>H-1→L+1 (5%) | H→L (93%)<br>H-1→L+1 (7%) | H→L (93%)<br>H-1→L+1 (7%) | H→L (93%)<br>H-1→L+1 (7%) |
| <b>OMeOMe</b>                         | H→L (97%)<br>H-2→L+3 (3%)  | H→L (97%)<br>H-2→L+3 (2%) | H→L (95%)<br>H-2→L+3 (5%) | H→L (94%)<br>H-2→L+3 (5%) | H→L (94%)<br>H-2→L+3 (5%) |
| <b>Me<sub>2</sub>NMe<sub>2</sub>N</b> | H→L (97%)                  | H→L (97%)                 | H→L (97%)<br>H-2→L+1 (2%) | H→L (96%)<br>H-2→L+1 (3%) | H→L (96%)<br>H-2→L+1 (3%) |
| <b>PhCN</b>                           | H→L (96%)<br>H-1→L+3 (2%)  | H→L (96%)<br>H-1→L+3 (2%) | H→L (95%)<br>H-1→L+3 (4%) | H→L (95%)<br>H-1→L+3 (2%) | H→L (95%)<br>H-1→L+3 (4%) |
| <b>PhOMe</b>                          | H→L (95%)<br>H-1→L+2 (3%)  | H→L (95%)<br>H-1→L+2 (2%) | H→L (94%)<br>H-1→L+2 (5%) | H→L (94%)<br>H-1→L+1 (5%) | H→L (94%)<br>H-1→L+1 (5%) |
| <b>PhMe<sub>2</sub>N</b>              | H→L (95%)<br>H→L+4 (3%)    | H→L (95%)<br>H→L+4 (3%)   | H→L (96%)<br>H-2→L+1 (3%) | H→L (96%)<br>H-2→L+1 (3%) | H→L (95%)<br>H-2→L+1 (3%) |
| <b>Me<sub>2</sub>NOMe</b>             | H→L (95%)                  | H→L (95%)<br>H→L+4 (2%)   | H→L (96%)<br>H-2→L+2 (3%) | H→L (96%)<br>H-2→L+2 (3%) | H→L (95%)<br>H-2→L+2 (3%) |
| <b>Me<sub>2</sub>NCN</b>              | H→L (96%)<br>H→L+2 (2%)    | H→L (96%)<br>H→L+2 (2%)   | H→L (98%)                 | H→L (98%)                 | H→L (97%)                 |



**Table S2** % of orbital contributions ( $S_0 \rightarrow S_1$ ) for the fluorophores in cyclohexane

| Molecule                              | % of orbital contributions                |                                           |                                                                         |                                                                         |                                                         |
|---------------------------------------|-------------------------------------------|-------------------------------------------|-------------------------------------------------------------------------|-------------------------------------------------------------------------|---------------------------------------------------------|
|                                       | M06-2X/<br>6-311G(d,p)                    | M05-2X/<br>6-311G(d,p)                    | LC-BLYP/<br>6-311G(d,p)                                                 | LC-PBE/<br>6-311G(d,p)                                                  | CAM-B3LYP/<br>6-311G(d,p)                               |
| <b>PhPh</b>                           | H→L (90%)<br>H-1→L+2 (7%)                 | H→L (89%)<br>H-1→L+1 (7%)                 | H→L (77%)<br>H-1→L+2 (12%)<br>H→L+7 (2%)<br>H-2→L+1 (4%)                | H→L (78%)<br>H-1→L+2 (11%)<br>H-2→L+1 (4%)<br>H→L+7 (2%)                | H→L (86%)<br>H-1→L+2 (9%)                               |
| <b>OMeOMe</b>                         | H→L (90%)<br>H-2→L+3 (5%)                 | H→L (90%)<br>H-2→L+1 (5%)                 | H→L (78%)<br>H-2→L+3 (10%)<br>H-5→L (3%)<br>H-1→L+4 (4%)                | H→L (79%)<br>H-2→L+3 (9%)<br>H-5→L (3%)<br>H-1→L+4 (4%)                 | H→L (87%)<br>H-1→L+4 (2%)<br>H-2→L+3 (7%)               |
| <b>Me<sub>2</sub>NMe<sub>2</sub>N</b> | H→L (91%)<br>H-1→L+4 (3%)<br>H-2→L+2 (3%) | H→L (91%)<br>H-1→L+4 (3%)<br>H-2→L+1 (3%) | H→L (78%)<br>H-1→L+4 (5%)<br>H-1→L+1 (2%)<br>H-2→L+1 (4%)<br>H-3→L (4%) | H→L (79%)<br>H-1→L+4 (5%)<br>H-1→L+1 (2%)<br>H-2→L+1 (4%)<br>H-3→L (4%) | H→L (88%)<br>H-1→L+4 (3%)<br>H-2→L+1 (4%)<br>H-3→L (2%) |
| <b>PhCN</b>                           | H→L (90%)<br>H-1→L+3 (5%)                 | H→L (89%)<br>H-1→L+3 (5%)                 | H→L (75%)<br>H-1→L+3 (9%)<br>H-3→L+1 (4%)<br>H→L+1 (3%)<br>H→L+7 (2%)   | H→L (76%)<br>H-1→L+3 (9%)<br>H-3→L+1 (4%)<br>H→L+1 (3%)<br>H→L+5 (2%)   | H→L (86%)<br>H-1→L+3 (7%)                               |

| Molecule                  | % of orbital contributions                            |                                                         |                                                                       |                                                                       |                                                         |
|---------------------------|-------------------------------------------------------|---------------------------------------------------------|-----------------------------------------------------------------------|-----------------------------------------------------------------------|---------------------------------------------------------|
|                           | M06-2X/<br>6-311G(d,p)                                | M05-2X/<br>6-311G(d,p)                                  | LC-BLYP/<br>6-311G(d,p)                                               | LC-PBE/<br>6-311G(d,p)                                                | CAM-B3LYP/<br>6-311G(d,p)                               |
| <b>PhOMe</b>              | H→L (89%)<br>H-1→L+2 (6%)                             | H→L (89%)<br>H-2→L+1 (6%)                               | H→L (76%)<br>H-2→L+4 (10%)<br>H-1→L+2 (2%)<br>H-1→L (2%)              | H→L (77%)<br>H-2→L+3(10%)<br>H-1→L+2 (2%)<br>H-1→L (2%)               | H→L (85%)<br>H-2→L+2 (8%)                               |
| <b>PhMe<sub>2</sub>N</b>  | H→L (88%)<br>H-1→L (4%)<br>H-2→L+1 (4%)               | H→L (87%)<br>H-1→L (4%)<br>H-2→L+1 (4%)                 | H→L (71%)<br>H-1→L (8%)<br>H-2→L+4 (8%)<br>H-1→L+2 (3%)<br>H→L+2 (5%) | H→L (71%)<br>H-1→L (8%)<br>H-1→L+2 (3%)<br>H-2→L+3 (7%)               | H→L (83%)<br>H→L+4 (2%)<br>H-1→L (6%)<br>H-2→L+1 (5%)   |
| <b>Me<sub>2</sub>NOMe</b> | H→L (90%)<br>H-2→L+2 (4%)                             | H→L (89%)<br>H-1→L+4 (2%)<br>H-1→L (2%)<br>H-1→L+2 (4%) | H→L (75%)<br>H-1→L+4 (5%)<br>H-1→L (4%)<br>H-2→L+3 (7%)<br>H-5→L (2%) | H→L (76%)<br>H-1→L+4 (5%)<br>H-1→L (4%)<br>H-2→L+3 (7%)<br>H-5→L (2%) | H→L (85%)<br>H-1→L+4 (2%)<br>H-1→L (3%)<br>H-2→L+2 (5%) |
| <b>Me<sub>2</sub>NCN</b>  | H→L (86%)<br>H→L+2 (5%)<br>H-1→L (6%)<br>H-2→L+3 (2%) | H→L (84%)<br>H→L+1 (5%)<br>H-1→L (6%)<br>H-2→L+3 (3%)   | H→L (62%)<br>H-1→L (14%)<br>H→L+1 (12%)<br>H-2→L+3 (6%)               | H→L (62%)<br>H-1→L (14%)<br>H→L+1 (12%)<br>H-2→L+3 (5%)               | H→L (80%)<br>H-1→L (8%)<br>H-2→L+3 (4%)<br>H→L+1 (6%)   |

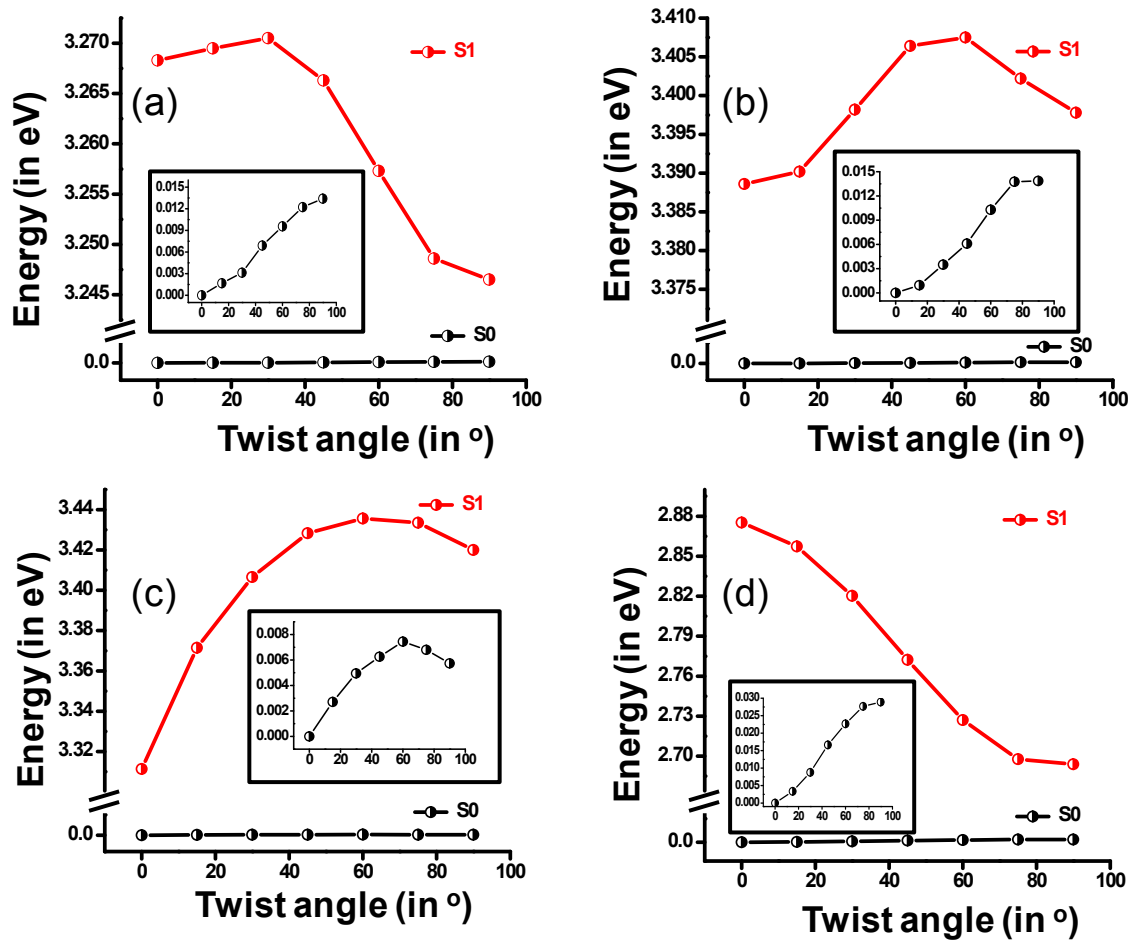

**Fig. S13** TDDFT potential energy curves (energy relative to the minimum of the ground state) of the ground and 1st excited singlet state of (a) **PhMe<sub>2</sub>N**, (b) **PhCN**, (c) **Me<sub>2</sub>NOMe**, and (d) **Me<sub>2</sub>NCN** in cyclohexane as a function of twist angle of the phenyl ring around the butadiyne moiety using PBE0/6-311+G(d,p) (expanded energy scale of S<sub>0</sub> is in inset)

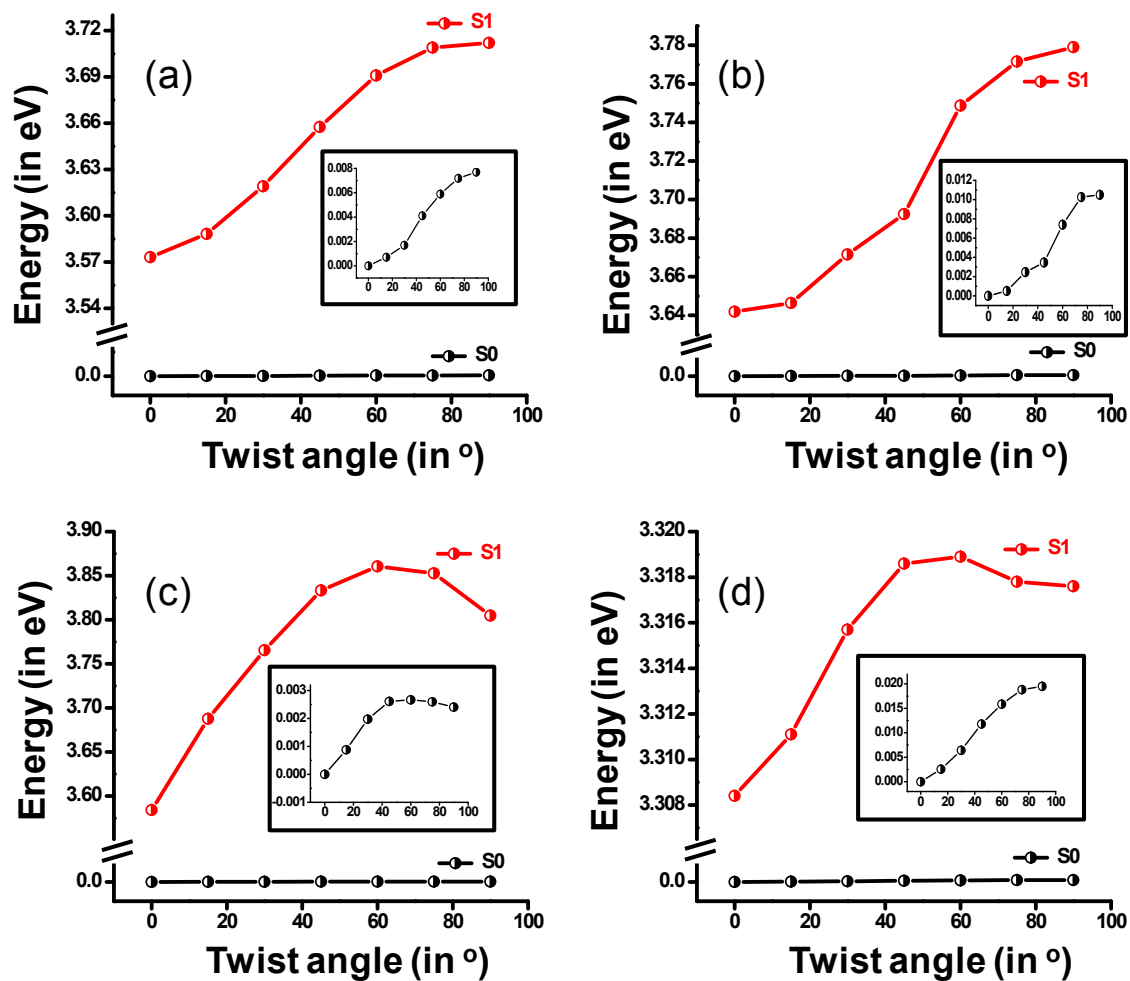

**Fig. S14** TDDFT potential energy curves (energy relative to the minimum of the ground state) of the ground and 1st excited singlet state of (a) PhMe<sub>2</sub>N, (b) PhCN, (c) Me<sub>2</sub>NOMe, and (d) Me<sub>2</sub>NCN in cyclohexane as a function of twist angle of the phenyl ring around the butadiyne moiety using CAM-B3LYP/6-311+G(d,p) (expanded energy scale of S<sub>0</sub> is in inset)

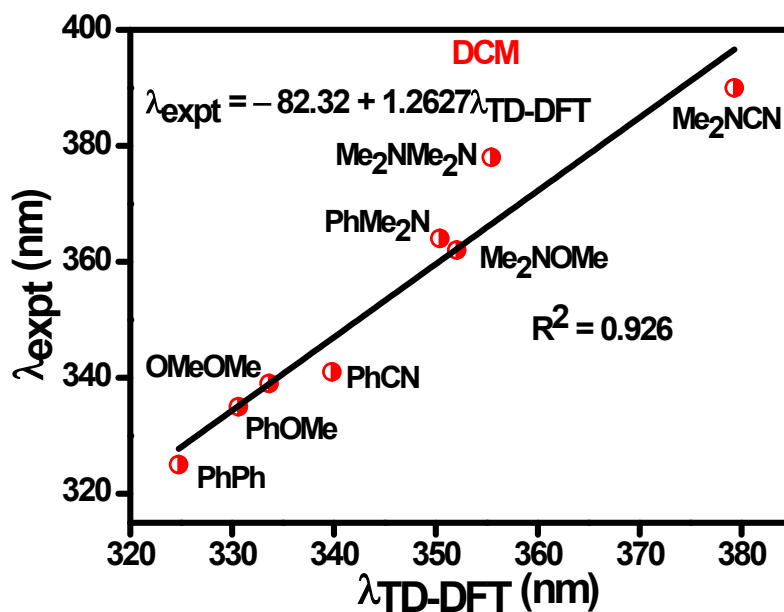

**Fig. S15** Correlation between experimental (ref. 1) and TD-DFT absorption wavelength in DCM using CAM-B3LYP/6-311+G(d,p) level of theory

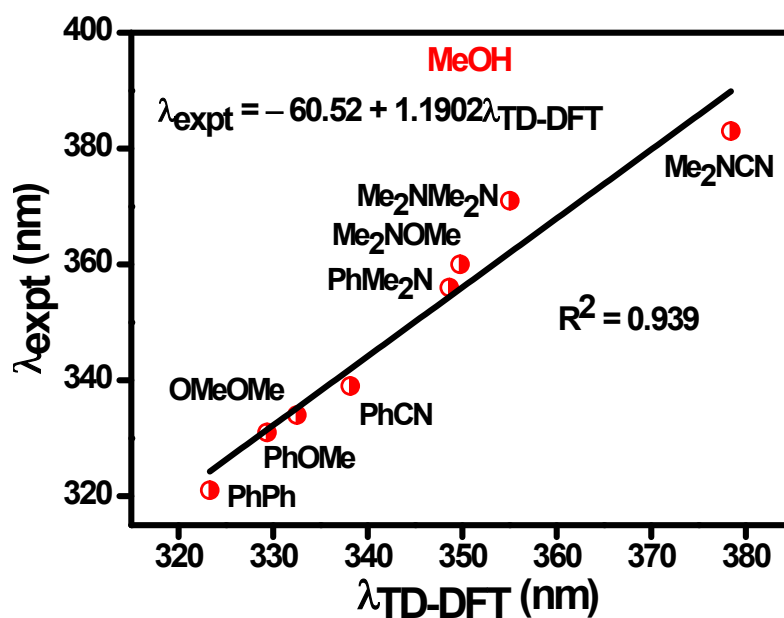

**Fig. S16** Correlation between experimental (ref. 1) and TD-DFT absorption wavelength in MeOH using CAM-B3LYP/6-311+G(d,p) level of theor

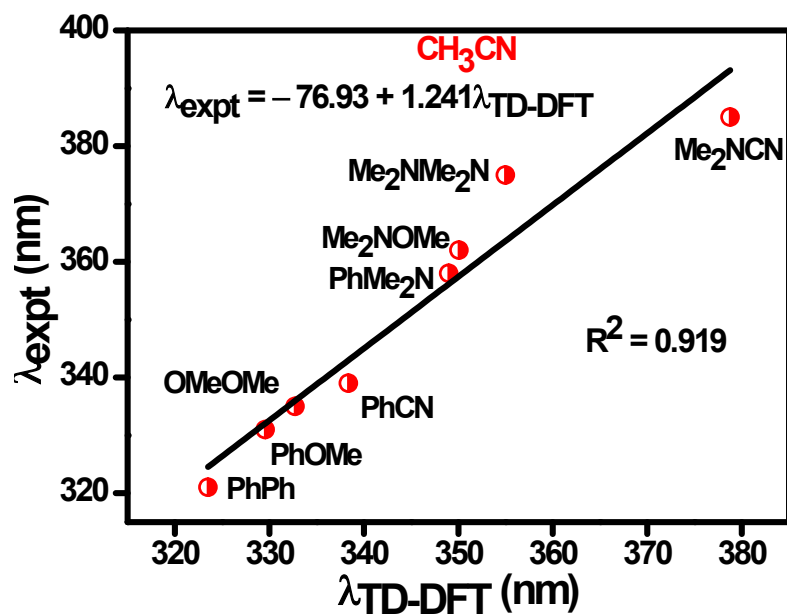

**Fig. S17** Correlation between experimental (ref. 1) and TD-DFT absorption wavelength in CH<sub>3</sub>CN using CAM-B3LYP/6-311+G(d,p) level of theory

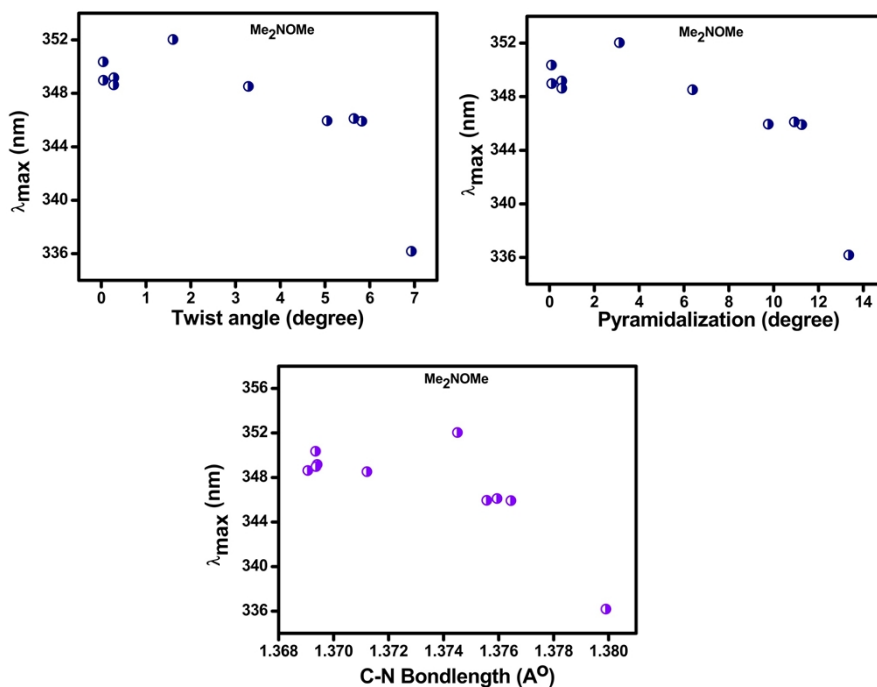

**Fig. S18** Correlation between vertical excitation energy and (a) twist angle, (b) pyramidalization, and (c) C(Ph)-N(NMe<sub>2</sub>) bond length in Me<sub>2</sub>NOMe

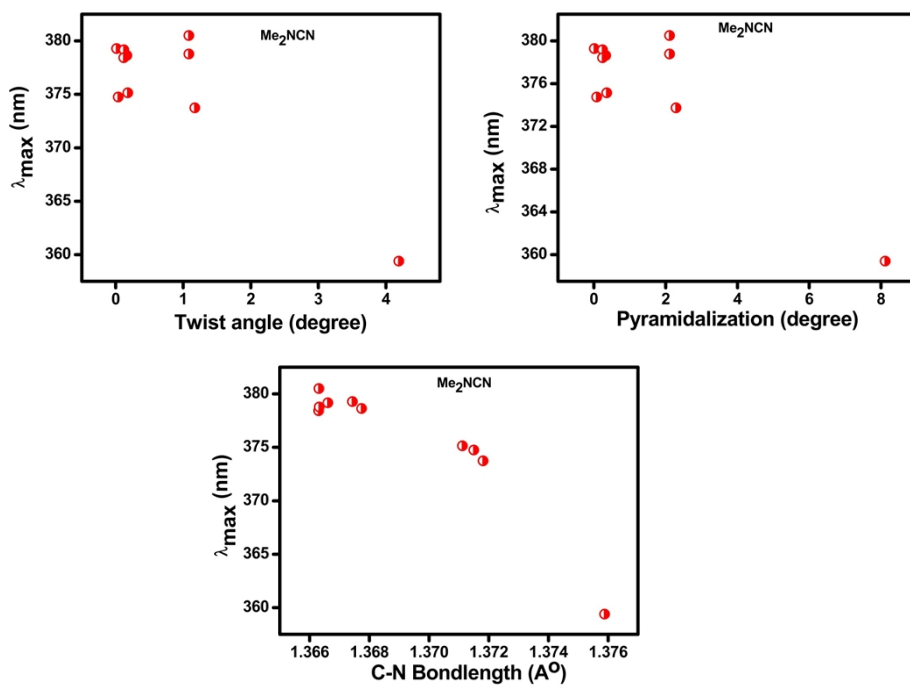

**Fig. S19** Correlation between vertical excitation energy and (a) twist angle, (b) pyramidalization of NMe<sub>2</sub>, and (c) C(Ph)–N(NMe<sub>2</sub>) bond length in Me<sub>2</sub>NCN

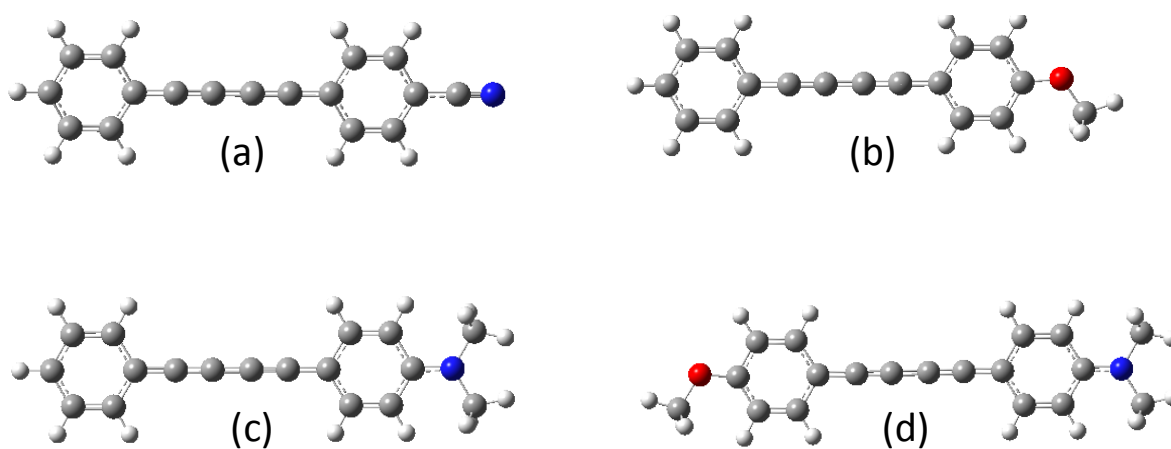

**Fig. S20** Optimized LE state geometry of the fluorophores (a) PhCN, (b) PhOMe, (c) PhMe<sub>2</sub>N, and (d) Me<sub>2</sub>NOMe in CH<sub>3</sub>CN using B3LYP/6-311G(d,p) level of theory

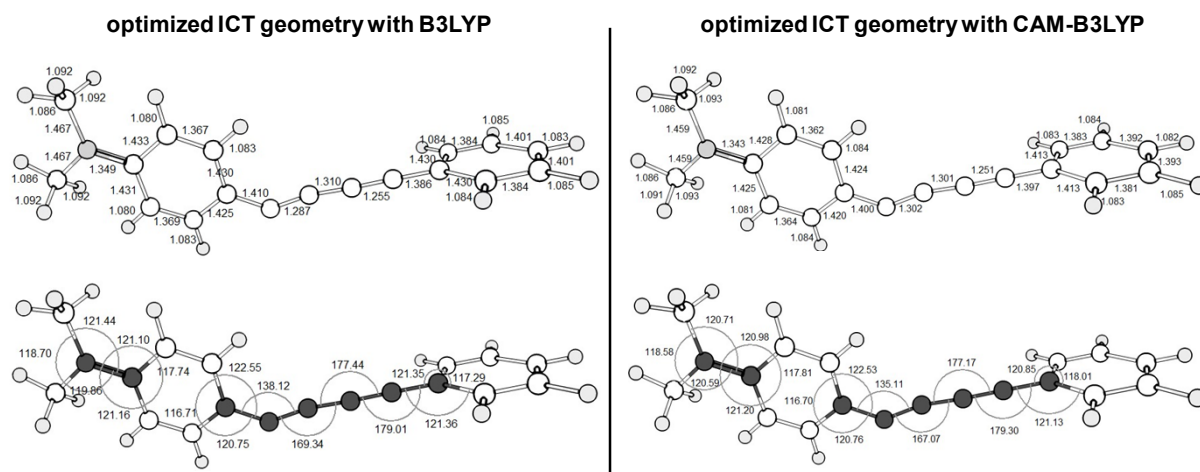

**Fig. S21** Geometrical parameters of the optimized ICT state geometry of **PhMe<sub>2</sub>N**

**Table S3** ICT emission energy of **PhCN** and **Me<sub>2</sub>NCN** using different functionals and 6-311+G(d,p) basis set

| Molecules                | ICT emission energies (in eV) in CH <sub>3</sub> CN |       |      |       |         |           |
|--------------------------|-----------------------------------------------------|-------|------|-------|---------|-----------|
|                          | Expt. <sup>a</sup>                                  | B3LYP | PBE0 | M052X | LC-BLYP | CAM-B3LYP |
| <b>PhCN</b>              | 2.62                                                | 2.67  | 2.75 | 2.78  | 3.20    | 3.01      |
| <b>Me<sub>2</sub>NCN</b> | 2.05                                                | 2.03  | 2.15 | 2.52  | 3.04    | 2.67      |

<sup>a</sup>Ref: 1



| Molecules      | HOMO                                                                               | LUMO                                                                                |
|----------------|------------------------------------------------------------------------------------|-------------------------------------------------------------------------------------|
| <b>PhCN</b>    | 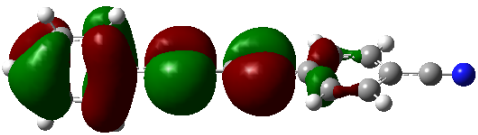  |   |
| <b>PhOMe</b>   |   |   |
| <b>Me2NOMe</b> |   |   |
| <b>Me2NCN</b>  |  |  |

**Fig. S22** HOMO and LUMO of **PhCN**, **PhOMe**, **Me<sub>2</sub>NOMe**, and **Me<sub>2</sub>NCN** in ICT emissive state in CH<sub>3</sub>CN

**Table S4** Absorption and LE TDM vectors using CAM-B3LYP/6-311+G(d,p)

| Molecules                | Absorption TDM       |        |       |   | LE TDM               |        |       |   |
|--------------------------|----------------------|--------|-------|---|----------------------|--------|-------|---|
|                          | Magnitude<br>(Debye) | Vector |       |   | Magnitude<br>(Debye) | Vector |       |   |
|                          |                      | x      | y     | z |                      | x      | y     | z |
| <b>PhCN</b>              | 7.12                 | 7.12   | 0     | 0 | 7.97                 | 0      | -7.97 | 0 |
| <b>PhOMe</b>             | 2.38                 | -1.53  | -1.82 | 0 | 2.98                 | -2.35  | -1.84 | 0 |
| <b>PhMe<sub>2</sub>N</b> | 5.17                 | 5.17   | 0     | 0 | 6.38                 | 6.38   | 0     | 0 |

**Cartesian co-ordinates of the optimized ground state geometry of the fluorophores in acetonitrile (B3LYP/6-311G(d,p))**

**Optimized ground state geometry of PhPh**

|   |              |              |              |
|---|--------------|--------------|--------------|
| 6 | -5.419539000 | 1.207897000  | -0.000870000 |
| 6 | -4.029818000 | 1.214109000  | -0.000880000 |
| 6 | -3.315668000 | -0.000021000 | 0.000000000  |
| 6 | -4.029881000 | -1.214112000 | 0.000883000  |
| 6 | -5.419603000 | -1.207828000 | 0.000878000  |
| 6 | -6.118388000 | 0.000052000  | 0.000006000  |
| 1 | -5.959139000 | 2.147822000  | -0.001553000 |
| 1 | -3.485881000 | 2.150801000  | -0.001565000 |
| 1 | -3.485995000 | -2.150834000 | 0.001565000  |
| 1 | -5.959251000 | -2.147725000 | 0.001564000  |
| 6 | -1.895127000 | -0.000056000 | -0.000003000 |
| 6 | -0.678536000 | -0.000084000 | -0.000007000 |
| 6 | 0.678536000  | -0.000043000 | -0.000012000 |
| 6 | 1.895127000  | -0.000047000 | -0.000015000 |
| 6 | 3.315668000  | -0.000015000 | -0.000006000 |
| 6 | 4.029824000  | 1.214111000  | 0.000880000  |

|   |              |              |              |
|---|--------------|--------------|--------------|
| 6 | 4.029876000  | -1.214111000 | -0.000883000 |
| 6 | 5.419545000  | 1.207892000  | 0.000881000  |
| 1 | 3.485892000  | 2.150806000  | 0.001561000  |
| 6 | 5.419597000  | -1.207833000 | -0.000868000 |
| 1 | 3.485984000  | -2.150830000 | -0.001570000 |
| 6 | 6.118388000  | 0.000045000  | 0.000010000  |
| 1 | 5.959149000  | 2.147815000  | 0.001568000  |
| 1 | 5.959241000  | -2.147732000 | -0.001549000 |
| 1 | 7.202123000  | 0.000068000  | 0.000017000  |
| 1 | -7.202123000 | 0.000081000  | 0.000008000  |

**Optimized ground state geometry of PhOMe**

|   |              |              |              |
|---|--------------|--------------|--------------|
| 6 | -4.408263000 | -1.019594000 | 0.001029000  |
| 6 | -3.018711000 | -1.050527000 | 0.001203000  |
| 6 | -2.262919000 | 0.134597000  | 0.000006000  |
| 6 | -2.952651000 | 1.367045000  | -0.001364000 |
| 6 | -4.333572000 | 1.403307000  | -0.001526000 |
| 6 | -5.076546000 | 0.211485000  | -0.000341000 |
| 1 | -4.956379000 | -1.951540000 | 0.001958000  |
| 1 | -2.508734000 | -2.006208000 | 0.002272000  |

|   |              |              |              |
|---|--------------|--------------|--------------|
| 1 | -2.389727000 | 2.292456000  | -0.002300000 |
| 1 | -4.866556000 | 2.346351000  | -0.002582000 |
| 6 | -0.845903000 | 0.095494000  | 0.000150000  |
| 6 | 0.371212000  | 0.063425000  | 0.000266000  |
| 6 | 1.727660000  | 0.029749000  | 0.000389000  |
| 6 | 2.944271000  | -0.000098000 | 0.000465000  |
| 6 | 4.364449000  | -0.033169000 | 0.000190000  |
| 6 | 5.051374000  | -1.263059000 | -0.001403000 |
| 6 | 5.107232000  | 1.163846000  | 0.001533000  |
| 6 | 6.440954000  | -1.288699000 | -0.001632000 |
| 1 | 4.486432000  | -2.187291000 | -0.002443000 |
| 6 | 6.496492000  | 1.125770000  | 0.001273000  |
| 1 | 4.585350000  | 2.113057000  | 0.002776000  |
| 6 | 7.167865000  | -0.097551000 | -0.000305000 |
| 1 | 6.958562000  | -2.240984000 | -0.002860000 |
| 1 | 7.057274000  | 2.053288000  | 0.002316000  |
| 8 | -6.423876000 | 0.356392000  | -0.000657000 |
| 6 | -7.243233000 | -0.816825000 | 0.000673000  |
| 1 | -7.067387000 | -1.419741000 | 0.895913000  |

|   |              |              |              |
|---|--------------|--------------|--------------|
| 1 | -8.269881000 | -0.457558000 | 0.000362000  |
| 1 | -7.067521000 | -1.421668000 | -0.893295000 |
| 1 | 8.251323000  | -0.122484000 | -0.000497000 |

**Optimized ground state geometry of OMeOMe**

|   |              |              |              |
|---|--------------|--------------|--------------|
| 6 | -5.412534000 | 1.355126000  | 0.000166000  |
| 6 | -4.030888000 | 1.348221000  | 0.000126000  |
| 6 | -3.314316000 | 0.131181000  | -0.000041000 |
| 6 | -4.045236000 | -1.069358000 | -0.000157000 |
| 6 | -5.435509000 | -1.067949000 | -0.000110000 |
| 6 | -6.130117000 | 0.148136000  | 0.000051000  |
| 1 | -5.965202000 | 2.286821000  | 0.000289000  |
| 1 | -3.488203000 | 2.285680000  | 0.000215000  |
| 1 | -3.515402000 | -2.014213000 | -0.000291000 |
| 1 | -5.963454000 | -2.011482000 | -0.000196000 |
| 6 | -1.896258000 | 0.123261000  | -0.000082000 |
| 6 | -0.678516000 | 0.120442000  | -0.000100000 |
| 6 | 0.678512000  | 0.120405000  | -0.000103000 |
| 6 | 1.896255000  | 0.123198000  | -0.000096000 |
| 6 | 3.314313000  | 0.131138000  | -0.000049000 |

|   |              |              |              |
|---|--------------|--------------|--------------|
| 6 | 4.030865000  | 1.348189000  | -0.000144000 |
| 6 | 4.045251000  | -1.069389000 | 0.000075000  |
| 6 | 5.412511000  | 1.355118000  | -0.000108000 |
| 1 | 3.488165000  | 2.285639000  | -0.000244000 |
| 6 | 5.435524000  | -1.067957000 | 0.000106000  |
| 1 | 3.515432000  | -2.014252000 | 0.000155000  |
| 6 | 6.130114000  | 0.148139000  | 0.000016000  |
| 1 | 5.965165000  | 2.286822000  | -0.000179000 |
| 1 | 5.963483000  | -2.011481000 | 0.000192000  |
| 8 | -7.481049000 | 0.264512000  | 0.000118000  |
| 6 | -8.274592000 | -0.925904000 | 0.000026000  |
| 1 | -8.086037000 | -1.526193000 | 0.894553000  |
| 1 | -9.308908000 | -0.589199000 | 0.000050000  |
| 1 | -8.086049000 | -1.526055000 | -0.894595000 |
| 8 | 7.481045000  | 0.264539000  | 0.000056000  |
| 6 | 8.274613000  | -0.925861000 | 0.000127000  |
| 1 | 9.308922000  | -0.589134000 | 0.000168000  |
| 1 | 8.086046000  | -1.526060000 | 0.894710000  |
| 1 | 8.086109000  | -1.526108000 | -0.894437000 |

### Optimized ground state geometry of PhCN

|   |              |              |              |
|---|--------------|--------------|--------------|
| 6 | -4.573048000 | -1.216230000 | 0.000049000  |
| 6 | -3.188350000 | -1.215078000 | 0.000066000  |
| 6 | -2.474738000 | 0.000098000  | 0.000015000  |
| 6 | -3.188481000 | 1.215197000  | -0.000054000 |
| 6 | -4.573179000 | 1.216200000  | -0.000070000 |
| 6 | -5.274386000 | -0.000053000 | -0.000017000 |
| 1 | -5.115676000 | -2.152856000 | 0.000088000  |
| 1 | -2.646958000 | -2.152269000 | 0.000118000  |
| 1 | -2.647190000 | 2.152447000  | -0.000094000 |
| 1 | -5.115908000 | 2.152767000  | -0.000122000 |
| 6 | -1.056964000 | 0.000176000  | 0.000029000  |
| 6 | 0.159343000  | 0.000213000  | 0.000048000  |
| 6 | 1.515045000  | 0.000144000  | 0.000077000  |
| 6 | 2.731618000  | 0.000069000  | 0.000099000  |
| 6 | 4.151262000  | 0.000007000  | 0.000035000  |
| 6 | 4.864197000  | -1.214855000 | -0.000053000 |
| 6 | 4.864305000  | 1.214805000  | 0.000067000  |

|   |              |              |              |
|---|--------------|--------------|--------------|
| 6 | 6.253673000  | -1.208450000 | -0.000106000 |
| 1 | 4.319797000  | -2.151189000 | -0.000077000 |
| 6 | 6.253780000  | 1.208277000  | 0.000013000  |
| 1 | 4.319988000  | 2.151187000  | 0.000136000  |
| 6 | 6.951807000  | -0.000117000 | -0.000074000 |
| 1 | 6.793682000  | -2.148028000 | -0.000173000 |
| 1 | 6.793872000  | 2.147807000  | 0.000039000  |
| 1 | 8.035521000  | -0.000165000 | -0.000117000 |
| 6 | -6.703142000 | -0.000131000 | -0.000032000 |
| 7 | -7.859083000 | -0.000191000 | -0.000049000 |

**Optimized ground state geometry of PhMe<sub>2</sub>N**

|   |              |              |              |
|---|--------------|--------------|--------------|
| 6 | -6.930602000 | -1.207115000 | -0.001312000 |
| 6 | -5.540756000 | -1.213357000 | -0.000543000 |
| 6 | -4.824229000 | -0.000006000 | 0.001205000  |
| 6 | -5.540686000 | 1.213387000  | 0.002188000  |
| 6 | -6.930532000 | 1.207228000  | 0.001390000  |
| 6 | -7.630630000 | 0.000077000  | -0.000365000 |
| 1 | -7.469612000 | -2.147551000 | -0.002690000 |
| 1 | -4.997714000 | -2.150692000 | -0.001331000 |



|   |              |              |              |
|---|--------------|--------------|--------------|
| 1 | -4.997589000 | 2.150689000  | 0.003531000  |
| 1 | -7.469488000 | 2.147695000  | 0.002130000  |
| 6 | -3.403914000 | -0.000048000 | 0.001748000  |
| 6 | -2.186102000 | -0.000065000 | 0.001854000  |
| 6 | -0.829986000 | -0.000086000 | 0.001504000  |
| 6 | 0.389493000  | -0.000125000 | 0.000615000  |
| 6 | 1.802853000  | -0.000093000 | -0.001284000 |
| 6 | 2.535731000  | -1.205444000 | -0.000648000 |
| 6 | 2.535666000  | 1.205299000  | -0.002643000 |
| 6 | 3.917329000  | -1.211251000 | -0.003377000 |
| 1 | 2.002670000  | -2.149122000 | 0.003031000  |
| 6 | 3.917262000  | 1.211177000  | -0.005388000 |
| 1 | 2.002553000  | 2.148952000  | -0.000567000 |
| 6 | 4.657932000  | -0.000019000 | -0.009325000 |
| 1 | 4.430347000  | -2.162453000 | -0.000652000 |
| 1 | 4.430238000  | 2.162407000  | -0.004352000 |
| 7 | 6.026148000  | 0.000048000  | -0.019640000 |
| 6 | 6.763014000  | 1.257534000  | 0.009856000  |
| 1 | 6.555895000  | 1.830880000  | 0.920974000  |

|   |              |              |              |
|---|--------------|--------------|--------------|
| 1 | 7.829017000  | 1.044501000  | -0.020498000 |
| 1 | 6.519534000  | 1.886983000  | -0.852716000 |
| 6 | 6.763208000  | -1.257293000 | 0.011086000  |
| 1 | 6.518789000  | -1.888132000 | -0.850189000 |
| 1 | 7.829146000  | -1.044173000 | -0.020916000 |
| 1 | 6.557252000  | -1.829229000 | 0.923366000  |
| 1 | -8.714375000 | 0.000110000  | -0.001000000 |

**Optimized ground state geometry of Me<sub>2</sub>NMe<sub>2</sub>N**

|   |             |              |              |
|---|-------------|--------------|--------------|
| 6 | 5.431005000 | 0.895820000  | -0.814641000 |
| 6 | 4.048464000 | 0.890253000  | -0.810297000 |
| 6 | 3.314785000 | 0.000402000  | 0.000929000  |
| 6 | 4.049289000 | -0.889138000 | 0.811748000  |
| 6 | 5.431834000 | -0.893882000 | 0.815573000  |
| 6 | 6.172316000 | 0.001455000  | 0.000624000  |
| 1 | 5.942471000 | 1.599415000  | -1.456338000 |
| 1 | 3.515459000 | 1.587391000  | -1.446565000 |
| 1 | 3.516936000 | -1.586922000 | 1.447855000  |
| 1 | 5.943979000 | -1.597650000 | 1.456536000  |
| 6 | 1.898508000 | -0.000073000 | 0.001126000  |

|   |              |              |              |
|---|--------------|--------------|--------------|
| 6 | 0.678563000  | -0.000454000 | 0.001284000  |
| 6 | -0.678571000 | -0.000848000 | 0.001439000  |
| 6 | -1.898516000 | -0.001184000 | 0.001540000  |
| 6 | -3.314795000 | -0.001531000 | 0.001690000  |
| 6 | -4.048762000 | -0.891242000 | -0.809426000 |
| 6 | -4.049008000 | 0.888288000  | 0.812467000  |
| 6 | -5.431308000 | -0.896601000 | -0.813507000 |
| 1 | -3.515986000 | -1.588305000 | -1.445969000 |
| 6 | -5.431551000 | 0.893244000  | 0.816544000  |
| 1 | -3.516428000 | 1.586285000  | 1.448149000  |
| 6 | -6.172319000 | -0.002431000 | 0.002235000  |
| 1 | -5.942991000 | -1.599869000 | -1.455389000 |
| 1 | -5.943481000 | 1.597546000  | 1.457089000  |
| 7 | -7.541714000 | -0.004009000 | 0.003878000  |
| 6 | -8.278009000 | 0.937117000  | 0.837913000  |
| 1 | -8.048303000 | 1.976633000  | 0.577642000  |
| 1 | -9.344462000 | 0.781344000  | 0.692212000  |
| 1 | -8.057134000 | 0.795017000  | 1.901781000  |
| 6 | -8.277990000 | -0.929380000 | -0.847572000 |

|   |              |              |              |
|---|--------------|--------------|--------------|
| 1 | -8.040051000 | -1.972457000 | -0.611554000 |
| 1 | -9.344334000 | -0.784412000 | -0.690347000 |
| 1 | -8.065415000 | -0.762765000 | -1.909926000 |
| 7 | 7.541698000  | 0.002445000  | 0.001053000  |
| 6 | 8.278421000  | -0.934467000 | 0.839422000  |
| 1 | 9.344769000  | -0.782269000 | 0.689242000  |
| 1 | 8.061103000  | -0.785209000 | 1.903156000  |
| 1 | 8.045594000  | -1.974951000 | 0.586363000  |
| 6 | 8.277632000  | 0.932798000  | -0.845257000 |
| 1 | 9.344063000  | 0.785514000  | -0.690823000 |
| 1 | 8.063231000  | 0.772981000  | -1.908200000 |
| 1 | 8.041171000  | 1.974746000  | -0.602441000 |

**Optimized ground state geometry of Me<sub>2</sub>NOMe**

|   |             |              |              |
|---|-------------|--------------|--------------|
| 6 | 5.917679000 | -1.031783000 | -0.000161000 |
| 6 | 4.527032000 | -1.049760000 | -0.000199000 |
| 6 | 3.780094000 | 0.141216000  | 0.000013000  |
| 6 | 4.483590000 | 1.366100000  | 0.000264000  |
| 6 | 5.865599000 | 1.389375000  | 0.000300000  |
| 6 | 6.598608000 | 0.191896000  | 0.000091000  |

|   |              |              |              |
|---|--------------|--------------|--------------|
| 1 | 6.455334000  | -1.970999000 | -0.000331000 |
| 1 | 4.009632000  | -2.002618000 | -0.000397000 |
| 1 | 3.930733000  | 2.298756000  | 0.000430000  |
| 1 | 6.406254000  | 2.329305000  | 0.000492000  |
| 6 | 2.362056000  | 0.115328000  | -0.000021000 |
| 6 | 1.143930000  | 0.093713000  | -0.000049000 |
| 6 | -0.212505000 | 0.069483000  | -0.000083000 |
| 6 | -1.431714000 | 0.046309000  | -0.000115000 |
| 6 | -2.845654000 | 0.017138000  | -0.000156000 |
| 6 | -3.553599000 | -1.202814000 | -0.000024000 |
| 6 | -3.605117000 | 1.205696000  | -0.000307000 |
| 6 | -4.935379000 | -1.238157000 | -0.000058000 |
| 1 | -3.001475000 | -2.136640000 | 0.000126000  |
| 6 | -4.987278000 | 1.182005000  | -0.000341000 |
| 1 | -3.093441000 | 2.162286000  | -0.000378000 |
| 6 | -5.702626000 | -0.043956000 | -0.000267000 |
| 1 | -5.425654000 | -2.202395000 | 0.000066000  |
| 1 | -5.518682000 | 2.124249000  | -0.000435000 |
| 7 | -7.071662000 | -0.073717000 | -0.000451000 |

|   |              |              |              |
|---|--------------|--------------|--------------|
| 6 | -7.833826000 | 1.167270000  | 0.000285000  |
| 1 | -7.621978000 | 1.775036000  | -0.886231000 |
| 1 | -8.895999000 | 0.934965000  | -0.000089000 |
| 1 | -7.622289000 | 1.773950000  | 0.887648000  |
| 6 | -7.778504000 | -1.346946000 | 0.000634000  |
| 1 | -7.540551000 | -1.943724000 | 0.888076000  |
| 1 | -8.849757000 | -1.161386000 | 0.000258000  |
| 1 | -7.540266000 | -1.945248000 | -0.885677000 |
| 8 | 7.948955000  | 0.324599000  | 0.000150000  |
| 6 | 8.755050000  | -0.854627000 | -0.000034000 |
| 1 | 9.785206000  | -0.506272000 | 0.000065000  |
| 1 | 8.574120000  | -1.457633000 | 0.893868000  |
| 1 | 8.574183000  | -1.457314000 | -0.894163000 |

**Optimized ground state geometry of Me<sub>2</sub>NCN**

|   |              |              |             |
|---|--------------|--------------|-------------|
| 6 | -6.095372000 | -1.215754000 | 0.000130000 |
| 6 | -4.711156000 | -1.214849000 | 0.000945000 |
| 6 | -3.994228000 | -0.000038000 | 0.001273000 |
| 6 | -4.711094000 | 1.214811000  | 0.000822000 |
| 6 | -6.095310000 | 1.215789000  | 0.000010000 |

|   |              |              |              |
|---|--------------|--------------|--------------|
| 6 | -6.798475000 | 0.000036000  | -0.000355000 |
| 1 | -6.637607000 | -2.152769000 | -0.000150000 |
| 1 | -4.170610000 | -2.152639000 | 0.001296000  |
| 1 | -4.170499000 | 2.152573000  | 0.001072000  |
| 1 | -6.637497000 | 2.152831000  | -0.000365000 |
| 6 | -2.578505000 | -0.000078000 | 0.001890000  |
| 6 | -1.360193000 | -0.000097000 | 0.002117000  |
| 6 | -0.006886000 | -0.000102000 | 0.002028000  |
| 6 | 1.213377000  | -0.000031000 | 0.001478000  |
| 6 | 2.623875000  | -0.000013000 | -0.000046000 |
| 6 | 3.356395000  | -1.206655000 | -0.000935000 |
| 6 | 3.356376000  | 1.206641000  | 0.000118000  |
| 6 | 4.736868000  | -1.212311000 | -0.003132000 |
| 1 | 2.822681000  | -2.149862000 | 0.000740000  |
| 6 | 4.736850000  | 1.212324000  | -0.002065000 |
| 1 | 2.822647000  | 2.149837000  | 0.002735000  |
| 6 | 5.477426000  | 0.000016000  | -0.006254000 |
| 1 | 5.250408000  | -2.163122000 | -0.002395000 |
| 1 | 5.250375000  | 2.163145000  | -0.000186000 |

|   |              |              |              |
|---|--------------|--------------|--------------|
| 7 | 6.843728000  | 0.000025000  | -0.013675000 |
| 6 | 7.581724000  | 1.257837000  | 0.004862000  |
| 1 | 7.372167000  | 1.838778000  | 0.910136000  |
| 1 | 8.647490000  | 1.043619000  | -0.020358000 |
| 1 | 7.340392000  | 1.878720000  | -0.864384000 |
| 6 | 7.581734000  | -1.257763000 | 0.006563000  |
| 1 | 7.343839000  | -1.878110000 | -0.864058000 |
| 1 | 8.647574000  | -1.043448000 | -0.014199000 |
| 1 | 7.368693000  | -1.839303000 | 0.910596000  |
| 6 | -8.226348000 | 0.000075000  | -0.001248000 |
| 7 | -9.382643000 | 0.000077000  | -0.001995000 |

**Cartesian co-ordinates of the optimized LE state geometry of the fluorophores in acetonitrile (B3LYP/6-311G(d,p))**

**Optimized LE state geometry of PhOMe**

|   |              |              |              |
|---|--------------|--------------|--------------|
| 6 | -4.395416000 | -1.031390000 | -0.002880000 |
| 6 | -3.017365000 | -1.067517000 | -0.051484000 |
| 6 | -2.238573000 | 0.137360000  | -0.062543000 |
| 6 | -2.953901000 | 1.384559000  | -0.029036000 |
| 6 | -4.324814000 | 1.409576000  | 0.019559000  |



|   |              |              |              |
|---|--------------|--------------|--------------|
| 6 | -5.069834000 | 0.207256000  | 0.034665000  |
| 1 | -4.948229000 | -1.960990000 | 0.004379000  |
| 1 | -2.504423000 | -2.021084000 | -0.080676000 |
| 1 | -2.392526000 | 2.310444000  | -0.040344000 |
| 1 | -4.866352000 | 2.347897000  | 0.048738000  |
| 6 | -0.863331000 | 0.101865000  | -0.103057000 |
| 6 | 0.389586000  | 0.067833000  | -0.111197000 |
| 6 | 1.703409000  | 0.034277000  | -0.103149000 |
| 6 | 2.956557000  | 0.002389000  | -0.087013000 |
| 6 | 4.333993000  | -0.031692000 | -0.026395000 |
| 6 | 5.047055000  | -1.278795000 | -0.003286000 |
| 6 | 5.107606000  | 1.178757000  | 0.011110000  |
| 6 | 6.427330000  | -1.296864000 | 0.061392000  |
| 1 | 4.483083000  | -2.203784000 | -0.036487000 |
| 6 | 6.487075000  | 1.128874000  | 0.075759000  |
| 1 | 4.589844000  | 2.130431000  | -0.008230000 |
| 6 | 7.164648000  | -0.101451000 | 0.098884000  |
| 1 | 6.946788000  | -2.249005000 | 0.080731000  |
| 1 | 7.052745000  | 2.054260000  | 0.104915000  |

|   |              |              |              |
|---|--------------|--------------|--------------|
| 8 | -6.408829000 | 0.351535000  | 0.083367000  |
| 6 | -7.242995000 | -0.814416000 | 0.086373000  |
| 1 | -7.045707000 | -1.434161000 | 0.964978000  |
| 1 | -8.264246000 | -0.441682000 | 0.123140000  |
| 1 | -7.094331000 | -1.400145000 | -0.825721000 |
| 1 | 8.247800000  | -0.128184000 | 0.151426000  |

**Optimized LE state geometry of PhCN**

|   |              |              |             |
|---|--------------|--------------|-------------|
| 6 | 1.215752000  | 4.573336000  | 0.000000000 |
| 6 | 1.214932000  | 3.188637000  | 0.000000000 |
| 6 | -0.000074000 | 2.474737000  | 0.000000000 |
| 6 | -1.215343000 | 3.188188000  | 0.000000000 |
| 6 | -1.216677000 | 4.572886000  | 0.000000000 |
| 6 | -0.000592000 | 5.274386000  | 0.000000000 |
| 1 | 2.152250000  | 5.116184000  | 0.000000000 |
| 1 | 2.152255000  | 2.647477000  | 0.000000000 |
| 1 | -2.152466000 | 2.646680000  | 0.000000000 |
| 1 | -2.153375000 | 5.115387000  | 0.000000000 |
| 6 | 0.000191000  | 1.056965000  | 0.000000000 |
| 6 | 0.000367000  | -0.159345000 | 0.000000000 |

|   |              |              |             |
|---|--------------|--------------|-------------|
| 6 | 0.000399000  | -1.515043000 | 0.000000000 |
| 6 | 0.000431000  | -2.731618000 | 0.000000000 |
| 6 | 0.000431000  | -4.151265000 | 0.000000000 |
| 6 | 1.215263000  | -4.864247000 | 0.000000000 |
| 6 | -1.214401000 | -4.864247000 | 0.000000000 |
| 6 | 1.208793000  | -6.253724000 | 0.000000000 |
| 1 | 2.151620000  | -4.319890000 | 0.000000000 |
| 6 | -1.207932000 | -6.253724000 | 0.000000000 |
| 1 | -2.150759000 | -4.319891000 | 0.000000000 |
| 6 | 0.000431000  | -6.951803000 | 0.000000000 |
| 1 | 2.148348000  | -6.793773000 | 0.000000000 |
| 1 | -2.147486000 | -6.793774000 | 0.000000000 |
| 1 | 0.000431000  | -8.035517000 | 0.000000000 |
| 6 | -0.000856000 | 6.703139000  | 0.000000000 |
| 7 | -0.001071000 | 7.859081000  | 0.000000000 |

**Optimized LE state geometry of PhMe<sub>2</sub>N**

|   |             |             |              |
|---|-------------|-------------|--------------|
| 6 | 6.923132000 | 1.211477000 | -0.003567000 |
| 6 | 5.541969000 | 1.226804000 | 0.000828000  |
| 6 | 4.795690000 | 0.000011000 | 0.000857000  |

|   |              |              |              |
|---|--------------|--------------|--------------|
| 6 | 5.541976000  | -1.226777000 | -0.001423000 |
| 6 | 6.923138000  | -1.211443000 | -0.005863000 |
| 6 | 7.634668000  | 0.000019000  | -0.006934000 |
| 1 | 7.463630000  | 2.152381000  | -0.003827000 |
| 1 | 5.003229000  | 2.167205000  | 0.002863000  |
| 1 | 5.003240000  | -2.167180000 | -0.001162000 |
| 1 | 7.463640000  | -2.152344000 | -0.007848000 |
| 6 | 3.413219000  | 0.000008000  | 0.005238000  |
| 6 | 2.164970000  | -0.000006000 | 0.006407000  |
| 6 | 0.841740000  | -0.000009000 | 0.007525000  |
| 6 | -0.404938000 | -0.000107000 | 0.007565000  |
| 6 | -1.787584000 | -0.000075000 | 0.004409000  |
| 6 | -2.538324000 | 1.219931000  | 0.002804000  |
| 6 | -2.538377000 | -1.220047000 | 0.003917000  |
| 6 | -3.910899000 | 1.219115000  | -0.002567000 |
| 1 | -2.004207000 | 2.161986000  | 0.005672000  |
| 6 | -3.910953000 | -1.219168000 | -0.001562000 |
| 1 | -2.004302000 | -2.162125000 | 0.007627000  |
| 6 | -4.652634000 | -0.000009000 | -0.007483000 |

|   |              |              |              |
|---|--------------|--------------|--------------|
| 1 | -4.429142000 | 2.167445000  | -0.000798000 |
| 1 | -4.429232000 | -2.167475000 | 0.000864000  |
| 7 | -6.016616000 | 0.000041000  | -0.020332000 |
| 6 | -6.760184000 | -1.255995000 | 0.004446000  |
| 1 | -6.551573000 | -1.825900000 | 0.916858000  |
| 1 | -7.824419000 | -1.037782000 | -0.029784000 |
| 1 | -6.508212000 | -1.881038000 | -0.858471000 |
| 6 | -6.760062000 | 1.256147000  | 0.002281000  |
| 1 | -6.507021000 | 1.880178000  | -0.862071000 |
| 1 | -7.824318000 | 1.038041000  | -0.032948000 |
| 1 | -6.552391000 | 1.827020000  | 0.914301000  |
| 1 | 8.718111000  | 0.000022000  | -0.010226000 |

**Optimized LE state geometry of Me<sub>2</sub>NCN**

|   |              |              |              |
|---|--------------|--------------|--------------|
| 6 | -6.095334000 | -1.215744000 | -0.000416000 |
| 6 | -4.711119000 | -1.214832000 | -0.000408000 |
| 6 | -3.994196000 | -0.000009000 | 0.000016000  |
| 6 | -4.711066000 | 1.214841000  | 0.000432000  |
| 6 | -6.095279000 | 1.215809000  | 0.000425000  |
| 6 | -6.798442000 | 0.000047000  | 0.000001000  |

|   |              |              |              |
|---|--------------|--------------|--------------|
| 1 | -6.637580000 | -2.152750000 | -0.000743000 |
| 1 | -4.170556000 | -2.152610000 | -0.000730000 |
| 1 | -4.170462000 | 2.152595000  | 0.000760000  |
| 1 | -6.637488000 | 2.152837000  | 0.000746000  |
| 6 | -2.578480000 | -0.000041000 | 0.000024000  |
| 6 | -1.360168000 | -0.000105000 | 0.000031000  |
| 6 | -0.006859000 | -0.000120000 | 0.000038000  |
| 6 | 1.213407000  | -0.000277000 | 0.000039000  |
| 6 | 2.623901000  | -0.000164000 | -0.000017000 |
| 6 | 3.356490000  | -1.206782000 | 0.000210000  |
| 6 | 3.356317000  | 1.206555000  | -0.000242000 |
| 6 | 4.736961000  | -1.212362000 | 0.000157000  |
| 1 | 2.822815000  | -2.150010000 | 0.000432000  |
| 6 | 4.736785000  | 1.212326000  | -0.000298000 |
| 1 | 2.822504000  | 2.149705000  | -0.000324000 |
| 6 | 5.477411000  | 0.000033000  | -0.000209000 |
| 1 | 5.250614000  | -2.163117000 | 0.000338000  |
| 1 | 5.250307000  | 2.163150000  | -0.000409000 |
| 7 | 6.843667000  | 0.000120000  | -0.000455000 |

|   |              |              |              |
|---|--------------|--------------|--------------|
| 6 | 7.581518000  | 1.258137000  | -0.000143000 |
| 1 | 7.356497000  | 1.858799000  | 0.887972000  |
| 1 | 8.647504000  | 1.043602000  | -0.001009000 |
| 1 | 7.355314000  | 1.859751000  | -0.887274000 |
| 6 | 7.581670000  | -1.257805000 | 0.000559000  |
| 1 | 7.355752000  | -1.859843000 | -0.886367000 |
| 1 | 8.647632000  | -1.043151000 | -0.000140000 |
| 1 | 7.356489000  | -1.858097000 | 0.888875000  |
| 6 | -8.226314000 | 0.000080000  | -0.000007000 |
| 7 | -9.382605000 | 0.000113000  | -0.000014000 |

**Cartesian co-ordinates of the optimized ICT state geometry of the fluorophores in acetonitrile (B3LYP/6-311G(d,p))**

**Optimized ICT state geometry of PhOMe**

|   |              |              |              |
|---|--------------|--------------|--------------|
| 6 | -4.630551000 | 0.943075000  | -0.000315000 |
| 6 | -3.351198000 | 1.451436000  | -0.000506000 |
| 6 | -2.204956000 | 0.606569000  | -0.000292000 |
| 6 | -2.428918000 | -0.808314000 | 0.000056000  |
| 6 | -3.695683000 | -1.325194000 | 0.000177000  |
| 6 | -4.817212000 | -0.456768000 | 0.000105000  |

|   |              |              |              |
|---|--------------|--------------|--------------|
| 1 | -5.477841000 | 1.613466000  | -0.000487000 |
| 1 | -3.193050000 | 2.522670000  | -0.000828000 |
| 1 | -1.569205000 | -1.467049000 | 0.000151000  |
| 1 | -3.877329000 | -2.392774000 | 0.000440000  |
| 6 | -0.914546000 | 1.169205000  | -0.000500000 |
| 6 | 0.303714000  | 0.719476000  | -0.000405000 |
| 6 | 1.591582000  | 0.530346000  | -0.000124000 |
| 6 | 2.826217000  | 0.284229000  | -0.000079000 |
| 6 | 4.190921000  | 0.046273000  | 0.000011000  |
| 6 | 4.918852000  | -0.080149000 | 1.221825000  |
| 6 | 4.918820000  | -0.081280000 | -1.221689000 |
| 6 | 6.283295000  | -0.315796000 | 1.205619000  |
| 1 | 4.390925000  | 0.011858000  | 2.163166000  |
| 6 | 6.283267000  | -0.316927000 | -1.205299000 |
| 1 | 4.390877000  | 0.009845000  | -2.163106000 |
| 6 | 6.984662000  | -0.437215000 | 0.000204000  |
| 1 | 6.811336000  | -0.406464000 | 2.149101000  |
| 1 | 6.811283000  | -0.408469000 | -2.148709000 |
| 8 | -6.004643000 | -1.058599000 | 0.000424000  |



|   |              |              |              |
|---|--------------|--------------|--------------|
| 6 | -7.214664000 | -0.275499000 | 0.000428000  |
| 1 | -7.270391000 | 0.343380000  | -0.896749000 |
| 1 | -8.022999000 | -1.001216000 | 0.000881000  |
| 1 | -7.269978000 | 0.344045000  | 0.897169000  |
| 1 | 8.051913000  | -0.621311000 | 0.000276000  |

**Optimized ICT state geometry of PhCN**

|   |              |              |              |
|---|--------------|--------------|--------------|
| 6 | 4.559262000  | -1.112359000 | -0.502660000 |
| 6 | 3.188669000  | -1.122266000 | -0.506648000 |
| 6 | 2.442918000  | -0.000008000 | -0.000040000 |
| 6 | 3.188629000  | 1.122258000  | 0.506605000  |
| 6 | 4.559222000  | 1.112370000  | 0.502686000  |
| 6 | 5.288002000  | 0.000010000  | 0.000031000  |
| 1 | 5.098298000  | -1.969294000 | -0.889565000 |
| 1 | 2.653889000  | -1.980110000 | -0.893837000 |
| 1 | 2.653818000  | 1.980096000  | 0.893769000  |
| 1 | 5.098228000  | 1.969311000  | 0.889617000  |
| 6 | 1.071603000  | -0.000018000 | -0.000074000 |
| 6 | -0.187774000 | -0.000031000 | -0.000104000 |
| 6 | -1.496384000 | -0.000017000 | -0.000131000 |

|   |              |              |              |
|---|--------------|--------------|--------------|
| 6 | -2.750401000 | 0.000005000  | -0.000187000 |
| 6 | -4.137151000 | 0.000007000  | -0.000071000 |
| 6 | -4.862713000 | -0.508654000 | 1.118672000  |
| 6 | -4.862901000 | 0.508662000  | -1.118693000 |
| 6 | -6.242485000 | -0.505841000 | 1.110552000  |
| 1 | -4.310212000 | -0.893310000 | 1.965968000  |
| 6 | -6.242672000 | 0.505838000  | -1.110345000 |
| 1 | -4.310542000 | 0.893320000  | -1.966082000 |
| 6 | -6.933067000 | -0.000004000 | 0.000161000  |
| 1 | -6.793181000 | -0.892100000 | 1.958843000  |
| 1 | -6.793512000 | 0.892091000  | -1.958546000 |
| 1 | -8.016413000 | -0.000008000 | 0.000250000  |
| 6 | 6.698450000  | 0.000019000  | 0.000066000  |
| 7 | 7.861769000  | 0.000027000  | 0.000095000  |

**Optimized ICT state geometry of PhMe<sub>2</sub>N**

|   |              |              |              |
|---|--------------|--------------|--------------|
| 6 | -6.687093000 | 0.428596000  | 1.205513000  |
| 6 | -5.333874000 | 0.137161000  | 1.221211000  |
| 6 | -4.606803000 | -0.021117000 | 0.000185000  |
| 6 | -5.333976000 | 0.136002000  | -1.220910000 |

|   |              |              |              |
|---|--------------|--------------|--------------|
| 6 | -6.687192000 | 0.427470000  | -1.205365000 |
| 6 | -7.385210000 | 0.578339000  | 0.000030000  |
| 1 | -7.210682000 | 0.541719000  | 2.149406000  |
| 1 | -4.810908000 | 0.024601000  | 2.163495000  |
| 1 | -4.811096000 | 0.022545000  | -2.163132000 |
| 1 | -7.210860000 | 0.539709000  | -2.149318000 |
| 6 | -3.252441000 | -0.314547000 | 0.000306000  |
| 6 | -2.030781000 | -0.601307000 | 0.000438000  |
| 6 | -0.743806000 | -0.843268000 | 0.000470000  |
| 6 | 0.455261000  | -1.310987000 | 0.000513000  |
| 6 | 1.775047000  | -0.815761000 | 0.000031000  |
| 6 | 2.887349000  | -1.706437000 | 0.000044000  |
| 6 | 2.071920000  | 0.583321000  | -0.000502000 |
| 6 | 4.180772000  | -1.256746000 | -0.000418000 |
| 1 | 2.686731000  | -2.770889000 | 0.000383000  |
| 6 | 3.356657000  | 1.051583000  | -0.000968000 |
| 1 | 1.244964000  | 1.283260000  | -0.000428000 |
| 6 | 4.466142000  | 0.145382000  | -0.000938000 |
| 1 | 4.988619000  | -1.973396000 | -0.000550000 |

|   |              |              |              |
|---|--------------|--------------|--------------|
| 1 | 3.530209000  | 2.117806000  | -0.001181000 |
| 7 | 5.736568000  | 0.599125000  | -0.001397000 |
| 6 | 6.036189000  | 2.034834000  | -0.003072000 |
| 1 | 5.628564000  | 2.519092000  | 0.887176000  |
| 1 | 7.114669000  | 2.157962000  | 0.010311000  |
| 1 | 5.606550000  | 2.512510000  | -0.886440000 |
| 6 | 6.852024000  | -0.353234000 | -0.000214000 |
| 1 | 6.807329000  | -0.992862000 | -0.884643000 |
| 1 | 7.780667000  | 0.208806000  | 0.017468000  |
| 1 | 6.822121000  | -0.986823000 | 0.889132000  |
| 1 | -8.443973000 | 0.806380000  | -0.000038000 |

**Optimized ICT state geometry of Me<sub>2</sub>NCN**

|   |             |              |              |
|---|-------------|--------------|--------------|
| 6 | 6.097852000 | -0.049978000 | 1.215252000  |
| 6 | 4.712794000 | -0.050084000 | 1.212906000  |
| 6 | 3.998177000 | -0.000564000 | -0.000538000 |
| 6 | 4.713805000 | 0.049394000  | -1.213364000 |
| 6 | 6.098866000 | 0.050126000  | -1.214519000 |
| 6 | 6.799576000 | 0.000294000  | 0.000668000  |
| 1 | 6.640429000 | -0.088044000 | 2.151174000  |

|   |              |              |              |
|---|--------------|--------------|--------------|
| 1 | 4.170830000  | -0.088294000 | 2.149056000  |
| 1 | 4.172624000  | 0.087296000  | -2.149981000 |
| 1 | 6.642224000  | 0.088555000  | -2.149973000 |
| 6 | 2.578584000  | -0.000780000 | -0.001109000 |
| 6 | 1.361336000  | -0.000818000 | -0.001455000 |
| 6 | 0.005519000  | -0.000730000 | -0.001709000 |
| 6 | -1.213736000 | -0.000585000 | -0.001640000 |
| 6 | -2.627431000 | -0.000337000 | -0.001328000 |
| 6 | -3.358877000 | 1.204824000  | 0.038327000  |
| 6 | -3.359360000 | -1.205236000 | -0.039984000 |
| 6 | -4.740394000 | 1.210820000  | 0.039602000  |
| 1 | -2.825437000 | 2.147706000  | 0.069673000  |
| 6 | -4.740880000 | -1.210729000 | -0.039622000 |
| 1 | -2.826304000 | -2.148317000 | -0.071880000 |
| 6 | -5.481245000 | 0.000182000  | 0.000396000  |
| 1 | -5.252826000 | 2.161659000  | 0.073712000  |
| 1 | -5.253703000 | -2.161387000 | -0.072937000 |
| 7 | -6.848872000 | 0.000435000  | 0.001220000  |
| 6 | -7.586707000 | -1.256795000 | -0.018344000 |

|   |              |              |              |
|---|--------------|--------------|--------------|
| 1 | -7.325349000 | -1.913983000 | 0.841873000  |
| 1 | -8.652185000 | -1.042581000 | 0.020006000  |
| 1 | -7.387796000 | -1.831373000 | -0.930142000 |
| 6 | -7.586218000 | 1.257958000  | 0.020680000  |
| 1 | -7.325062000 | 1.914737000  | -0.839916000 |
| 1 | -8.651797000 | 1.044134000  | -0.017007000 |
| 1 | -7.386612000 | 1.832787000  | 0.932161000  |
| 6 | 8.228714000  | 0.000746000  | 0.001289000  |
| 7 | 9.400114000  | 0.001116000  | 0.001799000  |

**Optimized ICT state geometry of PhMe<sub>2</sub>N using CAM-B3LYP/6-311G(d,p)**

|   |             |              |              |
|---|-------------|--------------|--------------|
| 6 | 6.643623000 | 0.535583000  | -1.155694000 |
| 6 | 5.294914000 | 0.232693000  | -1.188372000 |
| 6 | 4.586842000 | -0.016486000 | 0.009340000  |
| 6 | 5.302371000 | 0.037190000  | 1.226784000  |
| 6 | 6.649255000 | 0.344197000  | 1.235689000  |
| 6 | 7.337421000 | 0.590390000  | 0.049973000  |
| 1 | 7.164726000 | 0.726998000  | -2.086239000 |
| 1 | 4.767426000 | 0.190169000  | -2.133112000 |
| 1 | 4.780820000 | -0.161035000 | 2.155267000  |

|   |              |              |              |
|---|--------------|--------------|--------------|
| 1 | 7.174393000  | 0.383419000  | 2.183767000  |
| 6 | 3.223199000  | -0.319964000 | -0.014355000 |
| 6 | 2.005534000  | -0.606383000 | -0.038686000 |
| 6 | 0.727624000  | -0.844472000 | -0.084468000 |
| 6 | -0.466834000 | -1.362289000 | -0.104176000 |
| 6 | -1.770173000 | -0.851228000 | -0.078158000 |
| 6 | -2.891306000 | -1.721903000 | -0.063167000 |
| 6 | -2.044787000 | 0.545955000  | -0.064448000 |
| 6 | -4.172327000 | -1.255273000 | -0.020108000 |
| 1 | -2.707105000 | -2.789780000 | -0.079764000 |
| 6 | -3.316393000 | 1.032275000  | -0.027990000 |
| 1 | -1.206402000 | 1.232110000  | -0.084327000 |
| 6 | -4.433664000 | 0.144789000  | 0.015736000  |
| 1 | -4.992233000 | -1.959242000 | -0.007637000 |
| 1 | -3.474528000 | 2.101216000  | -0.022907000 |
| 7 | -5.689471000 | 0.616800000  | 0.078999000  |
| 6 | -5.947441000 | 2.053048000  | 0.065816000  |
| 1 | -5.594582000 | 2.507494000  | -0.863843000 |
| 1 | -7.018283000 | 2.217004000  | 0.138829000  |

|   |              |              |              |
|---|--------------|--------------|--------------|
| 1 | -5.473461000 | 2.539460000  | 0.920475000  |
| 6 | -6.827030000 | -0.296770000 | 0.074921000  |
| 1 | -6.777359000 | -0.988936000 | 0.916385000  |
| 1 | -7.741707000 | 0.282515000  | 0.164125000  |
| 1 | -6.873612000 | -0.871864000 | -0.853469000 |
| 1 | 8.393246000  | 0.824768000  | 0.067624000  |

**Reference:**

1. A. K. Pati, M. Mohapatra, P. Ghosh, S. J. Gharpure and A. K. Mishra, *J. Phys. Chem. A* **2013**, *117*, 6548-6560.
